# Supplementary material for: Dissimilatory Metabolism of Nitrogen Oxides in Bacteria: Comparative Reconstruction of Transcriptional Networks
Source: PLoS Comput Biol. 2005 Oct 28;1(5):e55. doi: 10.1371/journal.pcbi.0010055 (PMC1274295; doi:10.1371/journal.pcbi.0010055)
Supplement: Table S1 — (40 KB XLS) [file pcbi.0010055.st001.xls]

## Sheet: HcpR
Gene	Operon	Function	Sequence	Position	Score
Profile 1: Desulfovibrio spp.			wTGTGAnnnnnnTCACAw
Desulfovibrio desulfuricans G20
Ddes02002944	Ddes02002944	Uncharacterized protein conserved in Archaea	TTGTtAaATAatTCACAA	-118	5.61
Ddes02000834	Ddes02000834	two-component response regulator	TTGTGACAgcTGTCACAA	-80	5.58
aprA	aprA-aprB	APS reductase	TTGTtAaATATcTCACAA	-186	5.40
Ddes02003297	Ddes02003297		aTGTGACGcAgGTCACAg	-135	5.33
Ddes02001179	hcp-frdX	hybrid cluster protein, ferredoxin	TTGTGACtccgGTCACAt	-152	5.31
Ddes02001407	Ddes02001407	two-component response regulator	TTGTGAaGgAaaTaACAA	-18	5.18
Ddes02003164	Ddes02003164-Ddes02003165	putative sulfite/nitrite reductase, polyferredoxin	aTGTGACcTgCaTCACAg	-81	5.10
Ddes02002971	Ddes02002971-..-Ddes02002974	arylsulfatase, thioredoxin, thioredoxin reductase, sulfate transporter homolog	aTGTGAaAaACaTCACAt	-129	5.07
sat		ATP sulfurylase	TTGctAaAaATtTCACAA	-147	4.98
			TTGTtACAatTaTCACAt	-328	4.84
Desulfovibrio vulgaris
DVU2956	DVU2956	sigma-54-dependent transcriptional regulator	TTGTGACATgTaTaACAA	-74	5.48
DVU2280	DVU2280	amino acid permease family protein	aTGTGAaGgACtTCACAt	-152	5.27
DVU2543	hcp-frdX	hybrid cluster protein, ferredoxin	aTtTGACGcACGTCACAA	-179	5.24
phsA	DVU0173-DVU0174	thiosulfate reductase,iron-sulfur cluster-binding protein	aTGTGACGcATtTCgCAA	-194	5.21
sat	sat	ATP sulfurylase	TTGTaAatTtTtTCACAA	-148	5.20
aprA	aprAB-qmoABC	APS reductase, Qmo complex	TTGTtAatTcCaTCACAA	-168	5.18
DVU1080	DVU1080-DVU1081	putative sulfite/nitrite reductase, polyferredoxin	gTGTGACccgCGTCACAg	-52	5.10
Profile 2: other delta-proteobacteria, cyanobacteria			nnTTGACcnngGTCAAnn
Desulfotalea psychrophila
DP2828	frdX	ferredoxin	ATTTGAtCTAGGTCAAAg	-104	5.75
DP0742	hcp1	hybrid cluster protein	tcTTGACtTAGGTCAAAg	-116	5.72
DP1225	hcp2	hybrid cluster protein	AaTTGACCcAGGTCAAgg	-165	5.55
DP1226	hcp3	hybrid cluster protein	ccTTGACCTgGGTCAAtT	-201	5.55
Geobacter sulfurreducens
GSU0674	hcp	hybrid cluster protein	ccTTGACCcAcGTCAAgg	-136	5.49
GSU0105	GSU0105	cytochrome c family protein, putative	cTTTGACtTAcGTCAAAc	-38	5.26
GSU0224	COG1917	?	ccTTGACtcccGTCAAtg	-77	4.88
GSU0226	GSU0226-COG0270	L-lactate-permease, putative DNA methyltransferase	ccTTGAtgcAGGTCAAgg	-117	5.26
GSU0493	ndh-COG2006	NADH dehydrogenase, ferredoxin	gcTTGACCTgtGTCAAgg	-76	5.13
GSU3155	nrfHA-COG0348	nitrite reductase, polyferredoxin	tgTTGACtTgaGTCAAAc	-164	4.83
GSU3248	cytX-frdX	contain cytochrome c heme-binding site, ferredoxin	tTTTGACCTgcGTCAtga	-50	4.88
GSU2659	GSU2659-frdX2-COG3945	ferredoxin	tcTTGACCcAcaTCAtAa	-78	4.65
Geobacter metallireducens
Gmet02001372	napC	Nitrate/TMAO reductases, cytochrome	tTTTGACCTgcGTCAAgg	-88	5.45
Gmet02003230	COG1858-narGHJIUK	Nitrate reductase and transporter	AcTTGACtaAaGTCAAgg	-121	5.43
Gmet02001640	ndh-COG2006	NADH dehydrogenase, ferredoxin	tTTTGACCacGGTCAAgg	-89	5.26
Gmet02002069	Gmet02002069	TetR-family transcriptional regulator	tTTTGACtTAGaTCAAAc	-84	5.21
Gmet02002026	cytX2	nrfA-yccM upstream, contain cytochrome c heme-binding site	gcTTGACgcAGGTCAAgg	-68	5.19
Gmet02002977	COG1917	?	tTTTGACCggGGTCAAAc	-104	5.16
Gmet02002213	COG0270	putative DNA methyltransferase	caTTGAtgcAGGTCAAgg	-52	5.00
Gmet02002438	cytX-frdX	contain cytochrome c heme-binding site, ferredoxin	tTTTGACaTtGGTCAtga	-51	4.64
Gmet02003378	GSU2659-frdX2-COG3945	ferredoxin	tTTTGAttcAcaTCAtAa	-72	4.34
Desufuromonas spp.
389812	hcp1	hybrid cluster protein	ATTTGACCTcGGTCAAga	-155	5.65
389811	GSU2659-frdX2-COG3945	ferredoxin	tTTTGAtCTgcGTCAtgT	-73	4.79
391271	dnrN	involved in NO signalling, unknown function	cTTTGACCcgGGTCAAtT	-109	5.44
390920	hcp2	hybrid cluster protein	ATTTGACCTgGGTCAtgT	-127	5.40
389024	hcp3	hybrid cluster protein	tcTTGAtCTgGaTCAAAT	-85	5.31
390344	390344	Nucleoside-diphosphate-sugar epimerase	ATTTGACCccGGTCAAta	-117	5.26
392663	392663-nrfA	sigma-54 dependent transcriptional regulator, nitrite reductase	AaTTGAttcAGGTCAAgg	-85	5.22
392659	cytX2-ndh	contain cytochrome c heme-binding site,NADH dehydrogenase	AcTTGAtgaAGGTCAAgg	-105	5.16
390350	390350	ABC transporter ATPase component	tcTTGACtTAGaTaAAAT	-251	5.06
392163	COG0348	polyferredoxin	AaaTGACCcAGGTCAAAg	-80	5.06
390999	cytX1	contain cytochrome c heme-binding site,	ATTTGACggccGTCAAAg	-83	5.00
390998	frdX	ferredoxin	tTTTGAtgccGGTCAAgg	-96	4.97
Synechocystis sp.
norB	norB<>hcpR	nitric oxide reductase	tTTTGACtTAaGTCAAgg	-137	5.62
Anabaena variabilis ATCC 29413
Avar172001	hcp<>hcpR	hybrid cluster protein	tTTTGACtTAGaTCAAgg	-60	5.49
Profile 3: Clostridia and T.denticola			nnGTAACnnnnGTTACnn
Clostridium acetobutylicum
CAC0362	CAC0362	hypothetical protein	taGTAACATAaGTTACAG	-84	5.93
CAC0884	hcpR	FNR-like regulator	CaGTAACATATGTTACAc	-39	5.94
CAC0885	frdX	ferredoxin	gTGTAACATATGTTACtG	-102	5.94
CAC3428	hcp1	hybrid cluster protein	taGTAACcaATGTTACAG	-106	5.83
CAC2750	hcp2	hybrid cluster protein	aaGTAACAatTGTTACgG	-87	5.82
CAC0758	CAC0758-CAC0759-COG3945	hypothetical conserved proteins	tcGTAACgaAgGaTACcG	-134	4.67
Clostridium perfringens
CPE1479	CAC0759	hypothetical conserved protein	agGTAACcTATGTTACAG	-74	5.88
CPE1480	COG0659	sulfate permease	CTGTAACATAgGTTACct	-163	5.88
CPE2584	hcp	hybrid cluster protein	agGTAACtTtaGTTACcG	-134	5.60
CPE0441	COG1251	sulfite/nitrite reductase, assimilatory	taGTAACcTAaGTTACtt	-102	5.36
Clostridium botulinum
001_2066	hcp	hybrid cluster protein	tTGTAACATAgGTTACAG	-108	6.01
001_2172	frdX	ferredoxin	tgGTAACATtaGTTACAG	-75	5.94
001_2173	hcpR	FNR-like regulator	CTGTAACtaATGTTACca	-46	5.94
001_1264	CAC0759-COG3945	hypothetical conserved proteins	gaGTAACATccGTTACAG	-144	5.04
Clostridium tetani
CTC00410	hcp	hybrid cluster protein	tTGTAACATtTGTTACcG	-101	6.15
CTC00439	CTC00439	hypothetical protein	taGTAACATAaGTTACAG	-109	5.93
CTC00896	hcpR2	FNR-like regulator	CaGTAACcataGTTACta	-19	5.44
CTC00897	CTC00897-CTC00898	permease, have ferredoxin domain (4Fe-4S binding protein)	taGTAACtatgGTTACtG	-99	5.44
CTC01608	CAC0759-COG3945	hypothetical conserved proteins	tgGTAACtaATGTTACAt	-78	5.78
CTC01972	frdX	ferredoxin	acGTAACATtcGTTACAG	-94	5.64
CTC02534	CAC0362	hypothetical protein	tcGTAACATAcGTTACtt	-74	5.42
Treponema denticola
TDE0479	hcp	hybrid cluster protein	acGTAACatccGTTACcg	-75	6.10
Profile 4: Clostridium difficile only			nnGGATnTnnAnATCCnn
Clostridium difficile
001_1746	frdX-hcp	ferredoxin, hybrid cluster protein	ggGGATaTaaAaATCCta	-111	6.10
001_1747	hcpR	FNR-like regulator	taGGATtTttAtATCCcc	-46	6.10
Profile 5: Clostridium thermocellum only			nTGTTGnAnnTnCAACAn
Clostridium thermocellum
Chte02000580	frdX-hcp	ferredoxin, hybrid cluster protein	tTGTTGtAttTcCAACAg	-101	6.48
Chte02000581	hcpR	FNR-like regulator	cTGTTGgAaaTaCAACAa	-31	6.48
Profile 6: F.nucleatum only			ctGTAACAnnTGTTACag
Fusobacterium nucleatum
FN0684	hcp	hybrid cluster protein	CTGTAACATTTGTTACCG	-97	6.78
FN0127	FN0127	Fe-S oxidoreductase	CTGTAACAAATGTTACAa	-71	6.21
Profile 7: Thermotogales			cnGTAACAnnTGTTACng
Thermotoga maritima
TM1172	hcp	hybrid cluster protein	CCGTAACAATTGTTACaG	-81	6.73
Petrotoga miotherma
RPMI01941	hcp	hybrid cluster protein	gCGTAACAtTTGTTACtG	-134	6.29
Profile 8: Bacteroides spp.			nTGTAACnnnnGTTACAn
Bacteroides thetaiotaomicron
BT0687	hcp	hybrid cluster protein	aTGTAACATTGGTTACAA	-84	6.33
Bacteroides fragilis
BF2147	hcp	hybrid cluster protein	TTGTAACATTGGTTACAg	-81	6.33
BF3507	dnrN	involved in NO signalling, unknown function	cTGTAACATTGGTTACAA	-72	6.33
Profile 9, P.gingivalis only			nTGTCGCnnnnGCGACAn
Porphiromonas gingivalis
PG0893	hcp	hybrid cluster protein	gTGTCGCatagGCGACAt	-92	6.78
Profile 10: T.tengcongensis only			nTGTGAnnnnnnTCACAn
Thermoanaerobacter tengcongenesis
TTE2772	hcp	hybrid cluster protein	nTGTGAtttttgTCACAn	-78	5.96
