# Supplementary material for: Dissimilatory Metabolism of Nitrogen Oxides in Bacteria: Comparative Reconstruction of Transcriptional Networks
Source: PLoS Comput Biol. 2005 Oct 28;1(5):e55. doi: 10.1371/journal.pcbi.0010055 (PMC1274295; doi:10.1371/journal.pcbi.0010055)
Supplement: Table S4 — (24 KB XLS) [file pcbi.0010055.st004.xls]

## Sheet: DNR
Pseudomonas aeruginosa
nirS	nirSMCF…	tCTTGATTccggTCAAGC	-138	5.26	known regulation
norC	norCBD	tCTTGATTgccATCAAGC	-74	5.34	known regulation
PA0526	dnrP	GCTTGATcgcggTCAAGC	-71	5.37
nosR	nosRZDFYL	tCTTGAcTTtcATCAAGC	-137	5.36	known regulation
Pseudomonas stutzeri
nirS	nirSTB	GCTTGATTgcgATCAAGt	-247	5.33	known regulation
		tCTTGATTgccgTCAAGC	-134	5.19
nirM	nirMC	atTTGATTgcAATCAAGg	-226	4.58
norC	norCBD	tCTTGATTgccATCAAGC	-74	5.34	known regulation
nosR	nosRZDFYL	cCTTGATTgcAATCAAGg	-78	5.40	known regulation
dnrD	dnrD-dnrP	ctTTGAcgatcATCAAGg	-102	4.40
dnrS	dnrS	aaTTGAccgtcgTCAAGC	-148	4.45
hmp	hmp	cCTTGATTTcAgTCAAGt	-116	5.26
nnrS	nnrS	atcTGATcGCAATCAAGt	-131	4.11	known regulation
Thermochromatium tepidum
RCTE01907	hcp	cCTTGAcTTAgATCAAGt	-38	5.36
Acidithiobacillus ferrooxidans
001_1780	hcp-COG0543	aCTTGATTgAAATCAAGg	-78	5.41
001_2611	cgb-COG0543-COG0446	aCTTGAccgAAATCAAGg	-108	5.22
Thiobacillus dentrificans
002_0673		GgTTGAcTTAAATCAAGg	-192	5.22
002_0675	dnr	cCTTGATTTAAgTCAAcC	-42	5.22
002_0669	nirSNFL	cgTTGAccTAAATCAAGg	-90	5.08
006_0001	norB	cCTgGATgaAgATCcAGC	-190	4.70
001_0652	nosZRD..	GCcTGAccatgggCAAGC	-252	4.37
Chromobacterium violaceum
aniA (nirK)	nirK	aCTTGcTcTgggTCAAGC	-142	4.87
CV2711	nnrS	GCTTGATTcAAATCAttC	-44	4.83
norB	norB	tCTTGATcTgcATCAtGC	-107	5.03
Burkholderia pseudomallei, mallei
hemN	hemN-dnr	GgTTGATTTgcATCAAGt	-89	4.99
nnrS2	nnrS2	GCTTGATgTAgATCAAaC	-236	5.04
nosZ	nosZDFYL	GagTGATcTcgATCAAGC	-539	4.47
Ralstonia eutropha H16 megaplasmid
PHG201	PHG201-hmp	acTTGACTttgGTCAAgC	-228	5.16
nosZ	nosZRDFYL	tTTTGAtTCGAGTCAAgt	-109	5.03
Ralstonia eutropha JMP134
033_2005	nirS	cgTTGACaacAGTCAAcC	-92	5.16
Ralstonia metallidurans
063_0018	nirS	cgTTGACTCGtGTCAAtC	-116	5.58
072_1020	nosZRDFYL	acaTGACTtatGTCAAgC	-160	5.10
Ralstonia solanacearum
nosZ	nosZRDFYL	GTgTGACgaaAGTCAAtt	-127	4.67
nirK	nirK	GTTTGcgctGtGTCAAAg	-41	4.42
